# Supplementary material for: Excess Relative Risk as an Effect Measure in Case-Control Studies of Rare Diseases
Source: PubMed Central journal article supplement (PMC4412639; doi:10.1371/journal.pone.0121141), 2015-04-28
Supplement: pone.0121141.s001.pdf [file pone.0121141.s001.pdf]

Supporting Information of

Excess Relative Risk as an Effect Measure in Case-Control Studies of Rare Diseases

Author: Wen-Chung Lee

Author's affiliation: Research Center for Genes, Environment and Human Health,  
and Institute of Epidemiology and Preventive Medicine,  
College of Public Health, National Taiwan University, Taipei, Taiwan.

Correspondence & reprint requests: Prof. Wen-Chung Lee,

Rm. 536, No. 17, Xuzhou Rd., Taipei 100, Taiwan.

(FAX: 886-2-23511955)

(e-mail: [wenchung@ntu.edu.tw](mailto:wenchung@ntu.edu.tw))

S1 Exhibit. Optimal weighting systems and variance formulas for excess relative risk (ERR), population attributable fraction (PAF) and attributable fraction among the exposed population (AFE).

Let  $\hat{\mathbf{A}}$  and  $\hat{\mathbf{B}}$  denote the  $L \times 2$  matrices, the  $(s, e)$ -th elements of which being the sample proportions of subjects with  $S = s$  and  $E = e$  in the case ( $\hat{a}_{s,e}$ ) and the control ( $\hat{b}_{s,e}$ ) groups, respectively. Assuming that the cells counts are distributed according to two independent multinomial distributions (one for the cases and the other, the controls), the asymptotic variance-covariance matrices (of dimension,  $2L \times 2L$ ) are

$$\text{Var } \hat{\mathbf{A}} = \text{Var}(\text{vec } \hat{\mathbf{A}}) = \frac{1}{n_1} \times \left[ \text{Diag}(\text{vec } \hat{\mathbf{A}}) - (\text{vec } \hat{\mathbf{A}})(\text{vec } \hat{\mathbf{A}})^t \right],$$

$$\text{Var } \hat{\mathbf{B}} = \text{Var}(\text{vec } \hat{\mathbf{B}}) = \frac{1}{n_2} \times \left[ \text{Diag}(\text{vec } \hat{\mathbf{B}}) - (\text{vec } \hat{\mathbf{B}})(\text{vec } \hat{\mathbf{B}})^t \right],$$

and

$$\text{Cov}(\hat{\mathbf{A}}, \hat{\mathbf{B}}) = \mathbf{0},$$

respectively.

Let  $\hat{\boldsymbol{\theta}}$ ,  $\hat{\boldsymbol{\psi}}$ , and  $\hat{\boldsymbol{\phi}}$  be  $L \times 1$  vectors, with the  $s$ th element of which being

$$\hat{\theta}_s = \left( \frac{a_{s,1}}{b_{s,1}} - \frac{a_{s,2}}{b_{s,2}} \right) \times \frac{b_{+,2}}{a_{+,2}},$$

$$\hat{\psi}_s = \left( \frac{a_{s,1}}{b_{s,1}} - \frac{a_{s,2}}{b_{s,2}} \right) \times b_{+,1},$$

and

$$\hat{\phi}_s = \left( \frac{a_{s,1}}{b_{s,1}} - \frac{a_{s,2}}{b_{s,2}} \right) \times \frac{b_{+,1}}{a_{+,1}},$$

respectively. Their variance-covariance matrices can be obtained using the multivariate delta

method:

$$\text{Var } \hat{\boldsymbol{\theta}} = \left( \frac{\partial \hat{\boldsymbol{\theta}}}{\partial \hat{\mathbf{A}}} \right)^t (\text{Var } \hat{\mathbf{A}}) \left( \frac{\partial \hat{\boldsymbol{\theta}}}{\partial \hat{\mathbf{A}}} \right) + \left( \frac{\partial \hat{\boldsymbol{\theta}}}{\partial \hat{\mathbf{B}}} \right)^t (\text{Var } \hat{\mathbf{B}}) \left( \frac{\partial \hat{\boldsymbol{\theta}}}{\partial \hat{\mathbf{B}}} \right),$$

$$\text{Var } \hat{\boldsymbol{\psi}} = \left( \frac{\partial \hat{\boldsymbol{\psi}}}{\partial \hat{\mathbf{A}}} \right)^t (\text{Var } \hat{\mathbf{A}}) \left( \frac{\partial \hat{\boldsymbol{\psi}}}{\partial \hat{\mathbf{A}}} \right) + \left( \frac{\partial \hat{\boldsymbol{\psi}}}{\partial \hat{\mathbf{B}}} \right)^t (\text{Var } \hat{\mathbf{B}}) \left( \frac{\partial \hat{\boldsymbol{\psi}}}{\partial \hat{\mathbf{B}}} \right),$$

and

$$\text{Var } \hat{\boldsymbol{\phi}} = \left( \frac{\partial \hat{\boldsymbol{\phi}}}{\partial \hat{\mathbf{A}}} \right)^t (\text{Var } \hat{\mathbf{A}}) \left( \frac{\partial \hat{\boldsymbol{\phi}}}{\partial \hat{\mathbf{A}}} \right) + \left( \frac{\partial \hat{\boldsymbol{\phi}}}{\partial \hat{\mathbf{B}}} \right)^t (\text{Var } \hat{\mathbf{B}}) \left( \frac{\partial \hat{\boldsymbol{\phi}}}{\partial \hat{\mathbf{B}}} \right),$$

respectively. Here the differentiation of a vector with respect to a matrix follows the convention:

$$\frac{\partial \mathbf{y}}{\partial \mathbf{X}} = \frac{\partial \mathbf{y}^t}{\partial (\text{vec } \mathbf{X})} \text{ and has a dimension of } 2L \times L.$$

Let  $I_{\text{statement}}$  be an indicator function with a value of 1, if the statement is true, and 0, if otherwise. For  $i \in \{1, \dots, L\}$ ,  $j \in \{1, 2\}$ , and  $k \in \{1, \dots, L\}$ , the  $(i + L \times j - L, k)$ -th elements of the derivative matrices are

$$\left( \frac{I_{(i=k, j=1)}}{b_{k,1}} - \frac{I_{(i=k, j=2)}}{b_{k,2}} - \frac{I_{(j=2)} \times \hat{\boldsymbol{\theta}}_k}{b_{+,2}} \right) \times \frac{b_{+,2}}{a_{+,2}} \text{ for } \frac{\partial \hat{\boldsymbol{\theta}}}{\partial \hat{\mathbf{A}}},$$

$$\frac{I_{(j=2)} \times \hat{\boldsymbol{\theta}}_k}{b_{+,2}} - \left( \frac{I_{(i=k, j=1)} \times a_{k,1}}{b_{k,1}^2} - \frac{I_{(i=k, j=2)} \times a_{k,2}}{b_{k,2}^2} \right) \times \frac{b_{+,2}}{a_{+,2}} \text{ for } \frac{\partial \hat{\boldsymbol{\theta}}}{\partial \hat{\mathbf{B}}},$$

$$\left( \frac{I_{(i=k, j=1)}}{b_{k,1}} - \frac{I_{(i=k, j=2)}}{b_{k,2}} \right) \times b_{+,1} \text{ for } \frac{\partial \hat{\boldsymbol{\psi}}}{\partial \hat{\mathbf{A}}},$$

$$\frac{I_{(j=1)} \times \hat{\boldsymbol{\psi}}_k}{b_{+,1}} - \left( \frac{I_{(i=k, j=1)} \times a_{k,1}}{b_{k,1}^2} - \frac{I_{(i=k, j=2)} \times a_{k,2}}{b_{k,2}^2} \right) \times b_{+,1} \text{ for } \frac{\partial \hat{\boldsymbol{\psi}}}{\partial \hat{\mathbf{B}}},$$

$$\left( \frac{I_{(i=k, j=1)}}{b_{k,1}} - \frac{I_{(i=k, j=2)}}{b_{k,2}} - \frac{I_{(j=1)} \times \hat{\boldsymbol{\phi}}_k}{b_{+,1}} \right) \times \frac{b_{+,1}}{a_{+,1}} \text{ for } \frac{\partial \hat{\boldsymbol{\phi}}}{\partial \hat{\mathbf{A}}},$$

and

$$\frac{I_{(j=1)} \times \hat{\phi}_k}{b_{+,1}} - \left( \frac{I_{(i=k,j=1)} \times a_{k,1}}{b_{k,1}^2} - \frac{I_{(i=k,j=2)} \times a_{k,2}}{b_{k,2}^2} \right) \times \frac{b_{+,1}}{a_{+,1}} \text{ for } \frac{\partial \hat{\Phi}}{\partial \hat{\mathbf{B}}},$$

respectively.

The estimates for ERR, PAF and AFE are

$$\widehat{\text{ERR}} = \mathbf{w}^t \hat{\boldsymbol{\theta}},$$

$$\widehat{\text{PAF}} = \mathbf{u}^t \hat{\boldsymbol{\psi}},$$

and

$$\widehat{\text{AFE}} = \mathbf{v}^t \hat{\boldsymbol{\phi}},$$

respectively, with the weighting vectors subject to  $\mathbf{w}^t \mathbf{1} = \mathbf{u}^t \mathbf{1} = \mathbf{v}^t \mathbf{1} = 1$ , where  $\mathbf{1}$  is the summing vector (a '1' for each and every element). Using the extended Cauchy-Schwarz inequality (see Johnson RA, Wichern DW. Applied Multivariate Statistical Analysis. 3rd ed. New Jersey: Prentice-Hall International; 1992), the variances are

$$\text{Var}(\widehat{\text{ERR}}) = \mathbf{w}^t (\text{Var } \hat{\boldsymbol{\theta}}) \mathbf{w} \geq \frac{1}{\mathbf{1}^t (\text{Var } \hat{\boldsymbol{\theta}})^{-1} \mathbf{1}},$$

$$\text{Var}(\widehat{\text{PAF}}) = \mathbf{u}^t (\text{Var } \hat{\boldsymbol{\psi}}) \mathbf{u} \geq \frac{1}{\mathbf{1}^t (\text{Var } \hat{\boldsymbol{\psi}})^{-1} \mathbf{1}},$$

and

$$\text{Var}(\widehat{\text{AFE}}) = \mathbf{v}^t (\text{Var } \hat{\boldsymbol{\phi}}) \mathbf{v} \geq \frac{1}{\mathbf{1}^t (\text{Var } \hat{\boldsymbol{\phi}})^{-1} \mathbf{1}},$$

with equalities if and only if  $\mathbf{w} = \frac{(\text{Var } \hat{\boldsymbol{\theta}})^{-1} \mathbf{1}}{\mathbf{1}^t (\text{Var } \hat{\boldsymbol{\theta}})^{-1} \mathbf{1}}$ ,  $\mathbf{u} = \frac{(\text{Var } \hat{\boldsymbol{\psi}})^{-1} \mathbf{1}}{\mathbf{1}^t (\text{Var } \hat{\boldsymbol{\psi}})^{-1} \mathbf{1}}$ , and

$\mathbf{v} = \frac{(\text{Var } \hat{\boldsymbol{\phi}})^{-1} \mathbf{1}}{\mathbf{1}^t (\text{Var } \hat{\boldsymbol{\phi}})^{-1} \mathbf{1}}$ , respectively.
