# Supplementary material for: Excess Relative Risk as an Effect Measure in Case-Control Studies of Rare Diseases
Source: PubMed Central journal article supplement (PMC4412639; doi:10.1371/journal.pone.0121141), 2015-04-28
Supplement: pone.0121141.s002.pdf [file pone.0121141.s002.pdf]

Supporting Information of

Excess Relative Risk as an Effect Measure in Case-Control Studies of Rare Diseases

Author: Wen-Chung Lee

Author's affiliation: Research Center for Genes, Environment and Human Health,  
and Institute of Epidemiology and Preventive Medicine,  
College of Public Health, National Taiwan University, Taipei, Taiwan.

Correspondence & reprint requests: Prof. Wen-Chung Lee,

Rm. 536, No. 17, Xuzhou Rd., Taipei 100, Taiwan.

(FAX: 886-2-23511955)

(e-mail: [wenchung@ntu.edu.tw](mailto:wenchung@ntu.edu.tw))

S2 Exhibit. A homogeneity test.

For a rare disease, testing the additivity of the case-control odds in the case-control data is tantamount to testing a constant ERR in the study population. Let  $\hat{\delta}$  be a  $(L-1) \times 1$  column vector with the  $s$ th element being

$$\begin{aligned}\hat{\delta}_s &= \widehat{OD}_s - \widehat{OD}_L \\ &= \frac{a_{s,1}}{b_{s,1}} - \frac{a_{s,2}}{b_{s,2}} - \frac{a_{L,1}}{b_{L,1}} + \frac{a_{L,2}}{b_{L,2}}.\end{aligned}$$

Here  $\hat{\delta}_s$  are the estimates of the differences in the odds differences, using the odds difference of the  $L$ th stratum as the reference. (Any stratum can be taken to be the reference, with the same testing result.)

The variance-covariance matrix [of a dimension of  $(L-1) \times (L-1)$ ] of  $\hat{\delta}$  can be obtained using the multivariate delta method:

$$\text{Var } \hat{\delta} = \left( \frac{\partial \hat{\delta}}{\partial \hat{\mathbf{A}}} \right)^t (\text{Var } \hat{\mathbf{A}}) \left( \frac{\partial \hat{\delta}}{\partial \hat{\mathbf{A}}} \right) + \left( \frac{\partial \hat{\delta}}{\partial \hat{\mathbf{B}}} \right)^t (\text{Var } \hat{\mathbf{B}}) \left( \frac{\partial \hat{\delta}}{\partial \hat{\mathbf{B}}} \right).$$

For  $i \in \{1, \dots, L\}$ ,  $j \in \{1, 2\}$ , and  $k \in \{1, \dots, L-1\}$ , the  $(i+L \times j-L, k)$ -th elements of the derivative matrices are

$$\frac{I_{(i=k, j=1)}}{b_{k,1}} - \frac{I_{(i=k, j=2)}}{b_{k,2}} - \frac{I_{(i=L, j=1)}}{b_{L,1}} + \frac{I_{(i=L, j=2)}}{b_{L,2}} \quad \text{for } \frac{\partial \hat{\delta}}{\partial \hat{\mathbf{A}}},$$

and

$$-\frac{I_{(i=k, j=1)} \times a_{k,1}}{b_{k,1}^2} + \frac{I_{(i=k, j=2)} \times a_{k,2}}{b_{k,2}^2} + \frac{I_{(i=L, j=1)} \times a_{L,1}}{b_{L,1}^2} - \frac{I_{(i=L, j=2)} \times a_{L,2}}{b_{L,2}^2} \quad \text{for } \frac{\partial \hat{\delta}}{\partial \hat{\mathbf{B}}},$$

respectively. Next, the following statistic is calculated:

$$T = \hat{\delta}^t (\text{Var } \hat{\delta})^{-1} \hat{\delta},$$

which is distributed as a chi-square distribution with  $L - 1$  degree of freedom under the null hypothesis of a constant ERR in the study population (no mechanistic interaction between the exposure under study and the stratifying variable for a rare disease).
