# Supplementary material for: Excess Relative Risk as an Effect Measure in Case-Control Studies of Rare Diseases
Source: PubMed Central journal article supplement (PMC4412639; doi:10.1371/journal.pone.0121141), 2015-04-28
Supplement: pone.0121141.s003.pdf [file pone.0121141.s003.pdf]

Supporting Information of

Excess Relative Risk as an Effect Measure in Case-Control Studies of Rare Diseases

Author: Wen-Chung Lee

Author's affiliation: Research Center for Genes, Environment and Human Health,  
and Institute of Epidemiology and Preventive Medicine,  
College of Public Health, National Taiwan University, Taipei, Taiwan.

Correspondence & reprint requests: Prof. Wen-Chung Lee,

Rm. 536, No. 17, Xuzhou Rd., Taipei 100, Taiwan.

(FAX: 886-2-23511955)

(e-mail: [wenchung@ntu.edu.tw](mailto:wenchung@ntu.edu.tw))

S3 Exhibit. Estimation of population attributable fraction (PAF) and attributable fraction among the exposed population (AFE) under heterogeneity.

Under heterogeneity,

$$\begin{aligned}
 \widehat{AFE}_{\text{het}} &= \frac{\widehat{Risk}_{E=1} - \sum_{s=1}^L \widehat{\Pr}(S=s | E=1) \times \widehat{Risk}_{s,2}}{\widehat{Risk}_{E=1}} \\
 &= \frac{f \times \frac{CS_{+,1}}{CN_{+,1}} - \sum_{s=1}^L \frac{CN_{s,1}}{CN_{+,1}} \times f \times \frac{CS_{s,2}}{CN_{s,2}}}{f \times \frac{CS_{+,1}}{CN_{+,1}}} \\
 &= \left( CS_{+,1} - \sum_{s=1}^L \frac{CS_{s,2} \times CN_{s,1}}{CN_{s,2}} \right) / CS_{+,1} \\
 &= \sum_{s=1}^L \frac{CN_{s,1}}{CN_{+,1}} \times \left( \frac{CS_{s,1}}{CN_{s,1}} - \frac{CS_{s,2}}{CN_{s,2}} \right) \times \frac{CN_{+,1}}{CS_{+,1}} \\
 &= \sum_{s=1}^L \frac{CN_{s,1}}{CN_{+,1}} \times \hat{\phi}_s.
 \end{aligned}$$

Using Miettinen's case-based formula (see Miettinen OS. Proportion of disease caused or prevented by a given exposure, trait or intervention. Am J Epidemiol. 1974;99:325–332),

$$\begin{aligned}
 \widehat{PAF}_{\text{het}} &= (\text{exposure prevalence among cases}) \times \widehat{AFE}_{\text{het}} \\
 &= \frac{CS_{+,1}}{n_1} \times \sum_{s=1}^L \frac{CN_{s,1}}{CN_{+,1}} \times \left( \frac{CS_{s,1}}{CN_{s,1}} - \frac{CS_{s,2}}{CN_{s,2}} \right) \times \frac{CN_{+,1}}{CS_{+,1}} \\
 &= \sum_{s=1}^L \frac{CN_{s,1}}{CN_{+,1}} \times \left( \frac{CS_{s,1}}{CN_{s,1}} - \frac{CS_{s,2}}{CN_{s,2}} \right) \times \frac{CN_{+,1}}{n_1} \\
 &= \sum_{s=1}^L \frac{CN_{s,1}}{CN_{+,1}} \times \hat{\psi}_s.
 \end{aligned}$$
