# Supplementary material for: Excess Relative Risk as an Effect Measure in Case-Control Studies of Rare Diseases
Source: PubMed Central journal article supplement (PMC4412639; doi:10.1371/journal.pone.0121141), 2015-04-28
Supplement: pone.0121141.s006.pdf [file pone.0121141.s006.pdf]

Supporting Information of

Excess Relative Risk as an Effect Measure in Case-Control Studies of Rare Diseases

Author: Wen-Chung Lee

Author's affiliation: Research Center for Genes, Environment and Human Health,  
and Institute of Epidemiology and Preventive Medicine,  
College of Public Health, National Taiwan University, Taipei, Taiwan.

Correspondence & reprint requests: Prof. Wen-Chung Lee,

Rm. 536, No. 17, Xuzhou Rd., Taipei 100, Taiwan.

(FAX: 886-2-23511955)

(e-mail: [wenchung@ntu.edu.tw](mailto:wenchung@ntu.edu.tw))

S6 Exhibit. A proof that if the exposure under study is only associated with a specific disease entity, excess relative risk (ERR) for the exposure and this disease entity will be greater than that for the exposure and the disease as a whole.

Assumed that the disease under study is composed of two disease entities ( $D_I$  and  $D_{II}$ ) and that the exposure under study ( $E$ ) has no effect whatsoever on the occurrence of  $D_{II}$ , that is,  $\Pr(D_{II} = 1 | E = 1) = \Pr(D_{II} = 1 | E = 2)$ . We see that the excess risk ratio quantifying the relation between  $E$  and  $D$  (the  $D_I$  and  $D_{II}$  combined) is less than that between  $E$  and  $D_I$ :

$$\begin{aligned}
 \text{ERR}_{I+II} &= \frac{\Pr(D = 1 | E = 1) - \Pr(D = 1 | E = 2)}{\Pr(D = 1 | E = 2)} \\
 &= \frac{[\Pr(D_I = 1 | E = 1) + \Pr(D_{II} = 1 | E = 1)] - [\Pr(D_I = 1 | E = 2) + \Pr(D_{II} = 1 | E = 2)]}{\Pr(D_I = 1 | E = 2) + \Pr(D_{II} = 1 | E = 2)} \\
 &= \frac{\Pr(D_I = 1 | E = 1) - \Pr(D_I = 1 | E = 2)}{\Pr(D_I = 1 | E = 2) + \Pr(D_{II} = 1 | E = 2)} \\
 &< \frac{\Pr(D_I = 1 | E = 1) - \Pr(D_I = 1 | E = 2)}{\Pr(D_I = 1 | E = 2)} \\
 &= \text{ERR}_I.
 \end{aligned}$$
