# Supplementary material for: Excess Relative Risk as an Effect Measure in Case-Control Studies of Rare Diseases
Source: PubMed Central journal article supplement (PMC4412639; doi:10.1371/journal.pone.0121141), 2015-04-28
Supplement: pone.0121141.s007.pdf [file pone.0121141.s007.pdf]

Supporting Information of

Excess Relative Risk as an Effect Measure in Case-Control Studies of Rare Diseases

Author: Wen-Chung Lee

Author's affiliation: Research Center for Genes, Environment and Human Health,  
and Institute of Epidemiology and Preventive Medicine,  
College of Public Health, National Taiwan University, Taipei, Taiwan.

Correspondence & reprint requests: Prof. Wen-Chung Lee,

Rm. 536, No. 17, Xuzhou Rd., Taipei 100, Taiwan.

(FAX: 886-2-23511955)

(e-mail: [wenchung@ntu.edu.tw](mailto:wenchung@ntu.edu.tw))

S7 Exhibit. A proof that a constant excess relative risk (ERR) and a constant risk ratio (RR) models cannot be reconciled except for a weak exposure or when disease risks vary little across strata.

Under a constant ERR model, we have 
$$RR_s = \frac{Risk_{s,2} + ER}{Risk_{s,2}} = 1 + \frac{Risk_{E=2} \times ERR}{Risk_{s,2}}.$$

Therefore,

$$\begin{aligned} \text{Var}(RR_s) &= \text{Var}\left(\frac{Risk_{E=2} \times ERR}{Risk_{s,2}}\right) \\ &= \frac{Risk_{E=2}^2 \times ERR^2}{Risk_{E=2}^4} \times \text{Var}(Risk_{s,2}) \\ &= ERR^2 \times CV^2(Risk_{s,2}), \end{aligned}$$

where  $CV(Risk_{s,2}) = \frac{\sqrt{\text{Var}(Risk_{s,2})}}{Risk_{E=2}}$  is the coefficient of variation of the disease risks of the

unexposed population across the strata. Under a constant RR model, we have

$$ERR_s = \frac{RR \times Risk_{s,2} - Risk_{s,2}}{Risk_{E=2}} = \frac{(RR - 1)}{Risk_{E=2}} \times Risk_{s,2}. \text{ Therefore,}$$

$$\begin{aligned} \text{Var}(ERR_s) &= \text{Var}\left[\frac{(RR - 1)}{Risk_{E=2}} \times Risk_{s,2}\right] \\ &= \frac{(RR - 1)^2}{Risk_{E=2}^2} \times \text{Var}(Risk_{s,2}) \\ &= (RR - 1)^2 \times CV^2(Risk_{s,2}). \end{aligned}$$
